# Supplementary material for: Identification of a combination of transcription factors that synergistically increases endothelial cell barrier resistance
Source: PubMed Central journal article supplement (PMC7054428; doi:10.1038/s41598-020-60688-x), 2020-03-03

## **Supplementary Figure and Supplementary Dataset legends:**

### **Identification of a combination of transcription factors that synergistically increases endothelial cell barrier resistance**

Filip Roudnicky<sup>1</sup>, Bo Kyoung Kim<sup>2</sup>, Yanjun Lan<sup>1</sup>, Roland Schmucki<sup>3</sup>, Verena Küppers<sup>2</sup>, Klaus Christensen<sup>1</sup>, Martin Graf<sup>1</sup>, Christoph Patsch<sup>1</sup>, Mark Burcin<sup>1</sup>, Claas Aiko Meyer<sup>1#</sup>, Peter D. Westenskow<sup>2\*#</sup>, Chad A Cowan<sup>4,5,6\*#</sup>.

\*Corresponding authors: [ccowan@bidmc.harvard.edu](mailto:ccowan@bidmc.harvard.edu), [peter.westenskow@roche.com](mailto:peter.westenskow@roche.com)

## Supplementary Material and methods

**Analysis of published gene expression datasets.** Raw Affymetrix expression files were downloaded from GEO (GSE35802 <sup>1</sup>, GSE48209 <sup>2</sup>, GSE56777 <sup>3</sup>, GSE47067 <sup>4,5</sup>) and analyzed using the Partek Genomic Suite. Probeset data were normalized by making pre-background adjustments for GC correction and probe sequence bias, and then correcting for RMA background and carrying out quantile normalization. Normalized probe set data were  $\log_2$  transformed and summarized using the median polish method. Differential expression was determined using an ANOVA model. Data from a study by Nolan *et al.* <sup>4</sup>, where brain ECs were compared to several other tissues, were analyzed using RankProdIt <sup>6</sup>, a rank based meta-analysis tool that we used to generate a consensus brain EC gene signature.

Additionally, a literature search was conducted to find evidence of TFs that are associated with EC barrier resistance formation <sup>7-15</sup> or induction of molecules involved in barrier formation (e.g. tight junctions <sup>7-9, 12, 16-27</sup>).

## **Supplementary Figure and Supplementary Dataset legends:**

**Supplementary Figure 1. Expression of transcription factors in freshly isolated endothelial cells from different organs with upregulation in brain endothelial cells.** TF expression levels were compared between brain ECs and ECs of other vascular beds using data from three different studies (GSE47067<sup>4</sup>, GSE48209<sup>2</sup>, GSE35802<sup>1</sup>, GSE56777<sup>3,5</sup>). Data from a study by Nolan *et al.* (GSE47067<sup>4</sup>), where brain ECs were compared to several other tissues, was analyzed using RankProdIt<sup>6</sup>, a rank based meta-analysis tool, to generate a consensus brain EC fold-change in expression. The heatmap shows genes with the greatest fold difference. Genes were sorted based on RankProdIt fold-change (FC>1.5) in GSE47067<sup>4</sup>.

**Supplementary Figure 2. Relative mRNA expression of EC transporter genes as compared to empty vector adenovirus control.** Columns represent mean  $\pm$  SD. \*=*P* or FDR<0.05, \*\*=*P* or FDR<0.01, \*\*\*=*P* or FDR<0.001. All experiments were performed in triplicates.

**Supplementary Dataset 1. Fold-change in expression of genes in freshly isolated ECs from the BBB versus ECs from different organs as calculated using RankProdIt analysis.** Raw microarray expression data from GSE47067<sup>4</sup> of ECs from different vascular beds was analyzed using the Partek Genomics suite to calculate the fold-change in gene expression between ECs from brain versus other ECs of other vascular beds. RankProdIt values were calculated as a consensus summary fold-change.

**Supplementary Dataset 2. List of human and mouse transcription factors as identified by the FANTOM consortium<sup>28</sup>.**

**Supplementary Dataset 3. Fold-change expression of transcription factors that had a FC>1.5 in GSE47067 from studies with freshly isolated ECs from the BBB versus ECs from different organs. GSE47067 <sup>4</sup>, GSE48209 <sup>2</sup>, GSE35802 <sup>1</sup>, GSE56777 <sup>3,5</sup>.**

**Supplementary Dataset 4. Evidence from literature or expression that transcription factors are relevant to induction of high-barrier resistance of ECs.** The list denotes gene symbols, expression evidence from previous studies among 67 TFs that were identified from: GSE47067 <sup>4</sup> or literature evidence.

**Supplementary Dataset 5. RNA-seq differential expression analysis at 48 h after transduction of hPSC-ECs with adenovirus overexpressing transcription factors at 80 MOI.** FPKM (Fragments per Kilobase of transcript per Million mapped reads) values are listed for each gene and replicate.

**Supplementary Dataset 6. RNA-seq differential expression analysis at 48 h after transduction of hPSC-ECs with adenovirus overexpressing transcription factor combinations at 20 MOI.** RPKM (Reads per Kilobase of transcript per Million mapped reads) values are listed for each gene and replicate.

## References:

1. Tam, S.J. *et al.* Death receptors DR6 and TROY regulate brain vascular development. *Dev. Cell* **22**, 403-417 (2012).
2. Coppiello, G. *et al.* Meox2/Tcf15 heterodimers program the heart capillary endothelium for cardiac fatty acid uptake. *Circulation* **131**, 815-826 (2015).
3. Ben-Zvi, A. *et al.* Mfsd2a is critical for the formation and function of the blood-brain barrier. *Nature* **509**, 507-511 (2014).
4. Nolan, D.J. *et al.* Molecular signatures of tissue-specific microvascular endothelial cell heterogeneity in organ maintenance and regeneration. *Dev. Cell* **26**, 204-219 (2013).
5. Daneman, R. *et al.* The mouse blood-brain barrier transcriptome: a new resource for understanding the development and function of brain endothelial cells. *PLoS One* **5**, e13741 (2010).
6. Laing, E. & Smith, C.P. RankProdIt: A web-interactive Rank Products analysis tool. *BMC Res. Notes* **3**, 221 (2010).
7. Fontijn, R.D. *et al.* SOX-18 controls endothelial-specific claudin-5 gene expression and barrier function. *Am. J. Physiol. Heart Circ. Physiol.* **294**, H891-900 (2008).
8. Keil, J.M., Liu, X. & Antonetti, D.A. Glucocorticoid induction of occludin expression and endothelial barrier requires transcription factor p54 NONO. *Invest. Ophthalmol. Vis. Sci.* **54**, 4007-4015 (2013).
9. Yuan, L. *et al.* ETS-related gene (ERG) controls endothelial cell permeability via transcriptional regulation of the claudin 5 (CLDN5) gene. *J. Biol. Chem.* **287**, 6582-6591 (2012).
10. Mishra, S., Choe, Y., Pleasure, S.J. & Siegenthaler, J.A. Cerebrovascular defects in Foxc1 mutants correlate with aberrant WNT and VEGF-A pathways downstream of retinoic acid from the meninges. *Dev. Biol.* **420**, 148-165 (2016).
11. Reyahi, A. *et al.* Foxf2 Is Required for Brain Pericyte Differentiation and Development and Maintenance of the Blood-Brain Barrier. *Dev. Cell* **34**, 19-32 (2015).
12. Birdsey, G.M. *et al.* The endothelial transcription factor ERG promotes vascular stability and growth through Wnt/beta-catenin signaling. *Dev. Cell* **32**, 82-96 (2015).
13. Matsui, T. *et al.* Redundant roles of Sox17 and Sox18 in postnatal angiogenesis in mice. *J. Cell Sci.* **119**, 3513-3526 (2006).
14. Sangwung, P., Zhou, G., Nayak, L., Chan, E.R. & Kumar, S. KLF2 and KLF4 control endothelial identity and vascular integrity. *JCI Insight* **2**, e91700 (2017).
15. Zhou, Y., Williams, J., Smallwood, P.M. & Nathans, J. Sox7, Sox17, and Sox18 Cooperatively Regulate Vascular Development in the Mouse Retina. *PLoS One* **10**, e0143650 (2015).
16. Cowan, C.E. *et al.* Kruppel-like factor-4 transcriptionally regulates VE-cadherin expression and endothelial barrier function. *Circ. Res.* **107**, 959-966 (2010).
17. Jiang, H. *et al.* Tyrosine kinase receptor B protects against coronary artery disease and promotes adult vasculature integrity by regulating Ets1-mediated VE-cadherin expression. *Arterioscler. Thromb. Vasc. Biol.* **35**, 580-588 (2015).
18. Yuan, L. *et al.* RhoJ is an endothelial cell-restricted Rho GTPase that mediates vascular morphogenesis and is regulated by the transcription factor ERG. *Blood* **118**, 1145-1153 (2011).
19. Hupe, M. & Li, M.X. Gene expression profiles of brain endothelial cells during embryonic development at bulk and single-cell levels. *Sci. Signal.* **10** (2017).
20. Deleuze, V. *et al.* TAL-1/SCL and its partners E47 and LMO2 up-regulate VE-cadherin expression in endothelial cells. *Mol. Cell. Biol.* **27**, 2687-2697 (2007).
21. Badhwar, A., Stanimirovic, D.B., Hamel, E. & Haqqani, A.S. The proteome of mouse cerebral arteries. *J. Cereb. Blood Flow Metab.* **34**, 1033-1046 (2014).

22. Costa, G. *et al.* SOX7 regulates the expression of VE-cadherin in the haemogenic endothelium at the onset of haematopoietic development. *Development* **139**, 1587-1598 (2012).
23. Liebner, S. *et al.* Wnt/beta-catenin signaling controls development of the blood-brain barrier. *J. Cell Biol.* **183**, 409-417 (2008).
24. Lim, R.G. *et al.* Huntington's Disease iPSC-Derived Brain Microvascular Endothelial Cells Reveal WNT-Mediated Angiogenic and Blood-Brain Barrier Deficits. *Cell Rep.* **19**, 1365-1377 (2017).
25. Petrovic, I., Kovacevic-Grujicic, N. & Stevanovic, M. Early growth response protein 1 acts as an activator of SOX18 promoter. *Exp. Mol. Med.* **42**, 132-142 (2010).
26. Essien, B.E. *et al.* Transcription Factor ZBP-89 Drives a Feedforward Loop of beta-Catenin Expression in Colorectal Cancer. *Cancer Res.* **76**, 6877-6887 (2016).
27. Fan, Y. *et al.* Kruppel-like factor-11, a transcription factor involved in diabetes mellitus, suppresses endothelial cell activation via the nuclear factor-kappaB signaling pathway. *Arterioscler. Thromb. Vasc. Biol.* **32**, 2981-2988 (2012).
28. Kanamori, M. *et al.* A genome-wide and nonredundant mouse transcription factor database. *Biochem. Biophys. Res. Commun.* **322**, 787-793 (2004).

# Supplementary Figure S1.

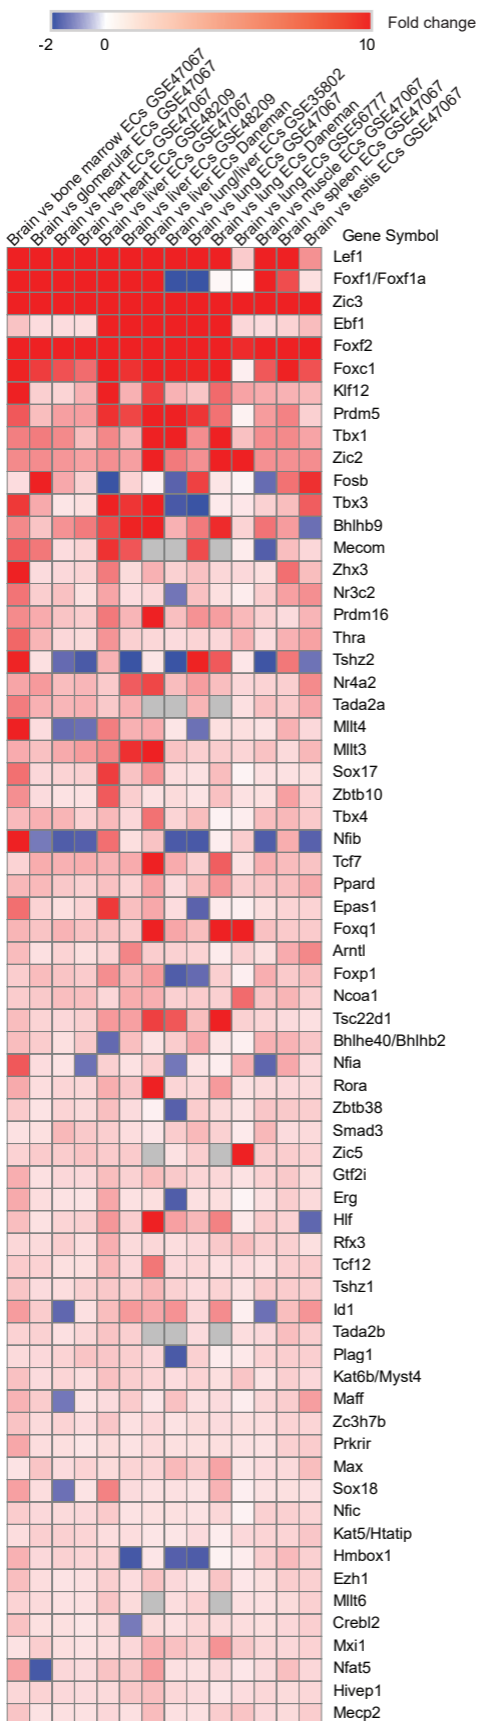

# Supplementary Figure S2.

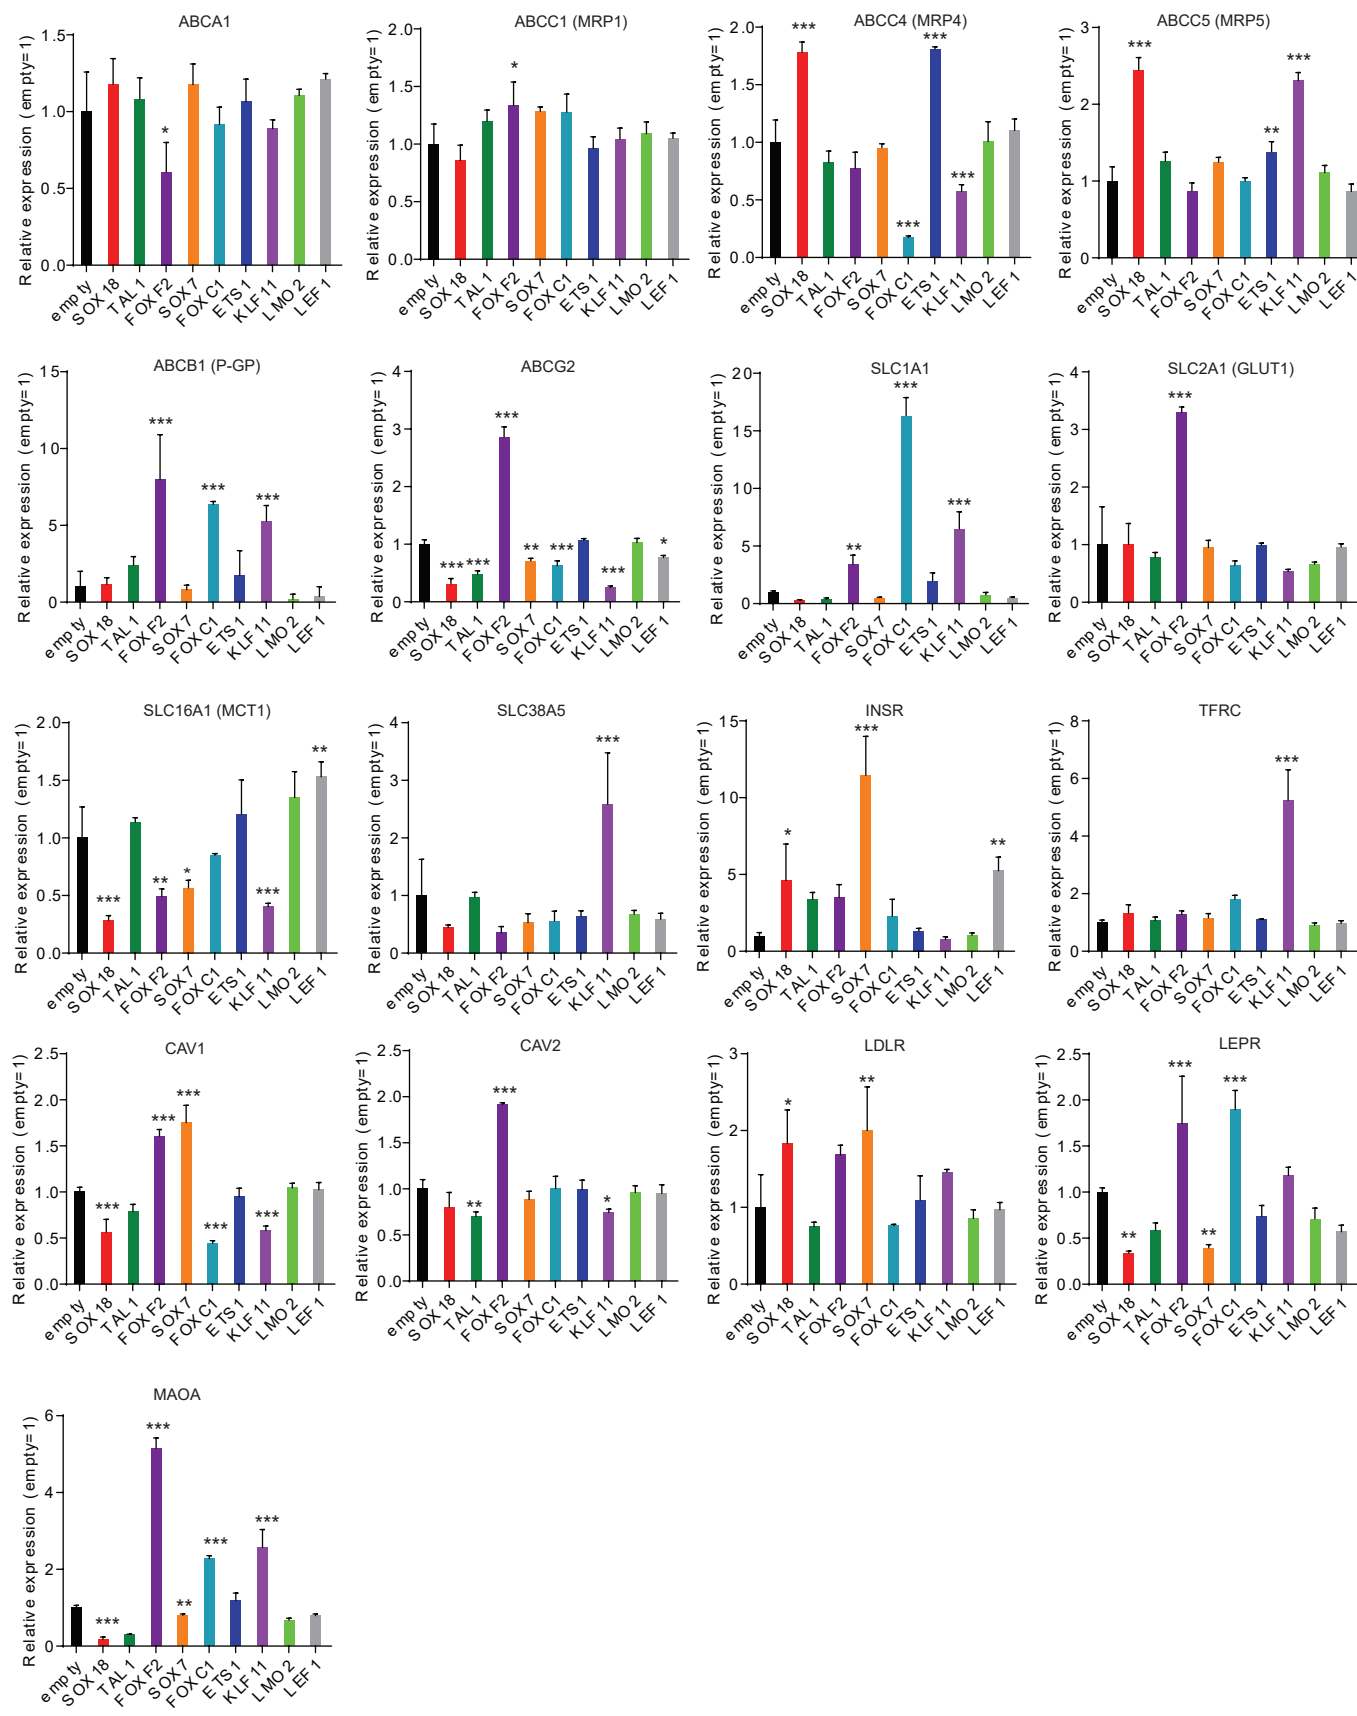

Supplement: 41598_2020_60688_MOESM1_ESM.pdf [file 41598_2020_60688_MOESM1_ESM.pdf]
